# Supplementary material for: Consumption of NADPH for 2-HG Synthesis Increases Pentose Phosphate Pathway Flux and Sensitizes Cells to Oxidative Stress
Source: Cell Rep. Author manuscript; Available in PMC 2018 Jul 20. (PMC6053654; doi:10.1016/j.celrep.2017.12.050)
Supplement: 1 [file NIHMS935575-supplement-1.pdf]

**Cell Reports, Volume 22**

## **Supplemental Information**

**Consumption of NADPH for 2-HG Synthesis**

**Increases Pentose Phosphate Pathway Flux**

**and Sensitizes Cells to Oxidative Stress**

**Susan J. Gelman, Fuad Naser, Nathaniel G. Mahieu, Lisa D. McKenzie, Gavin P. Dunn, Milan G. Chheda, and Gary J. Patti**

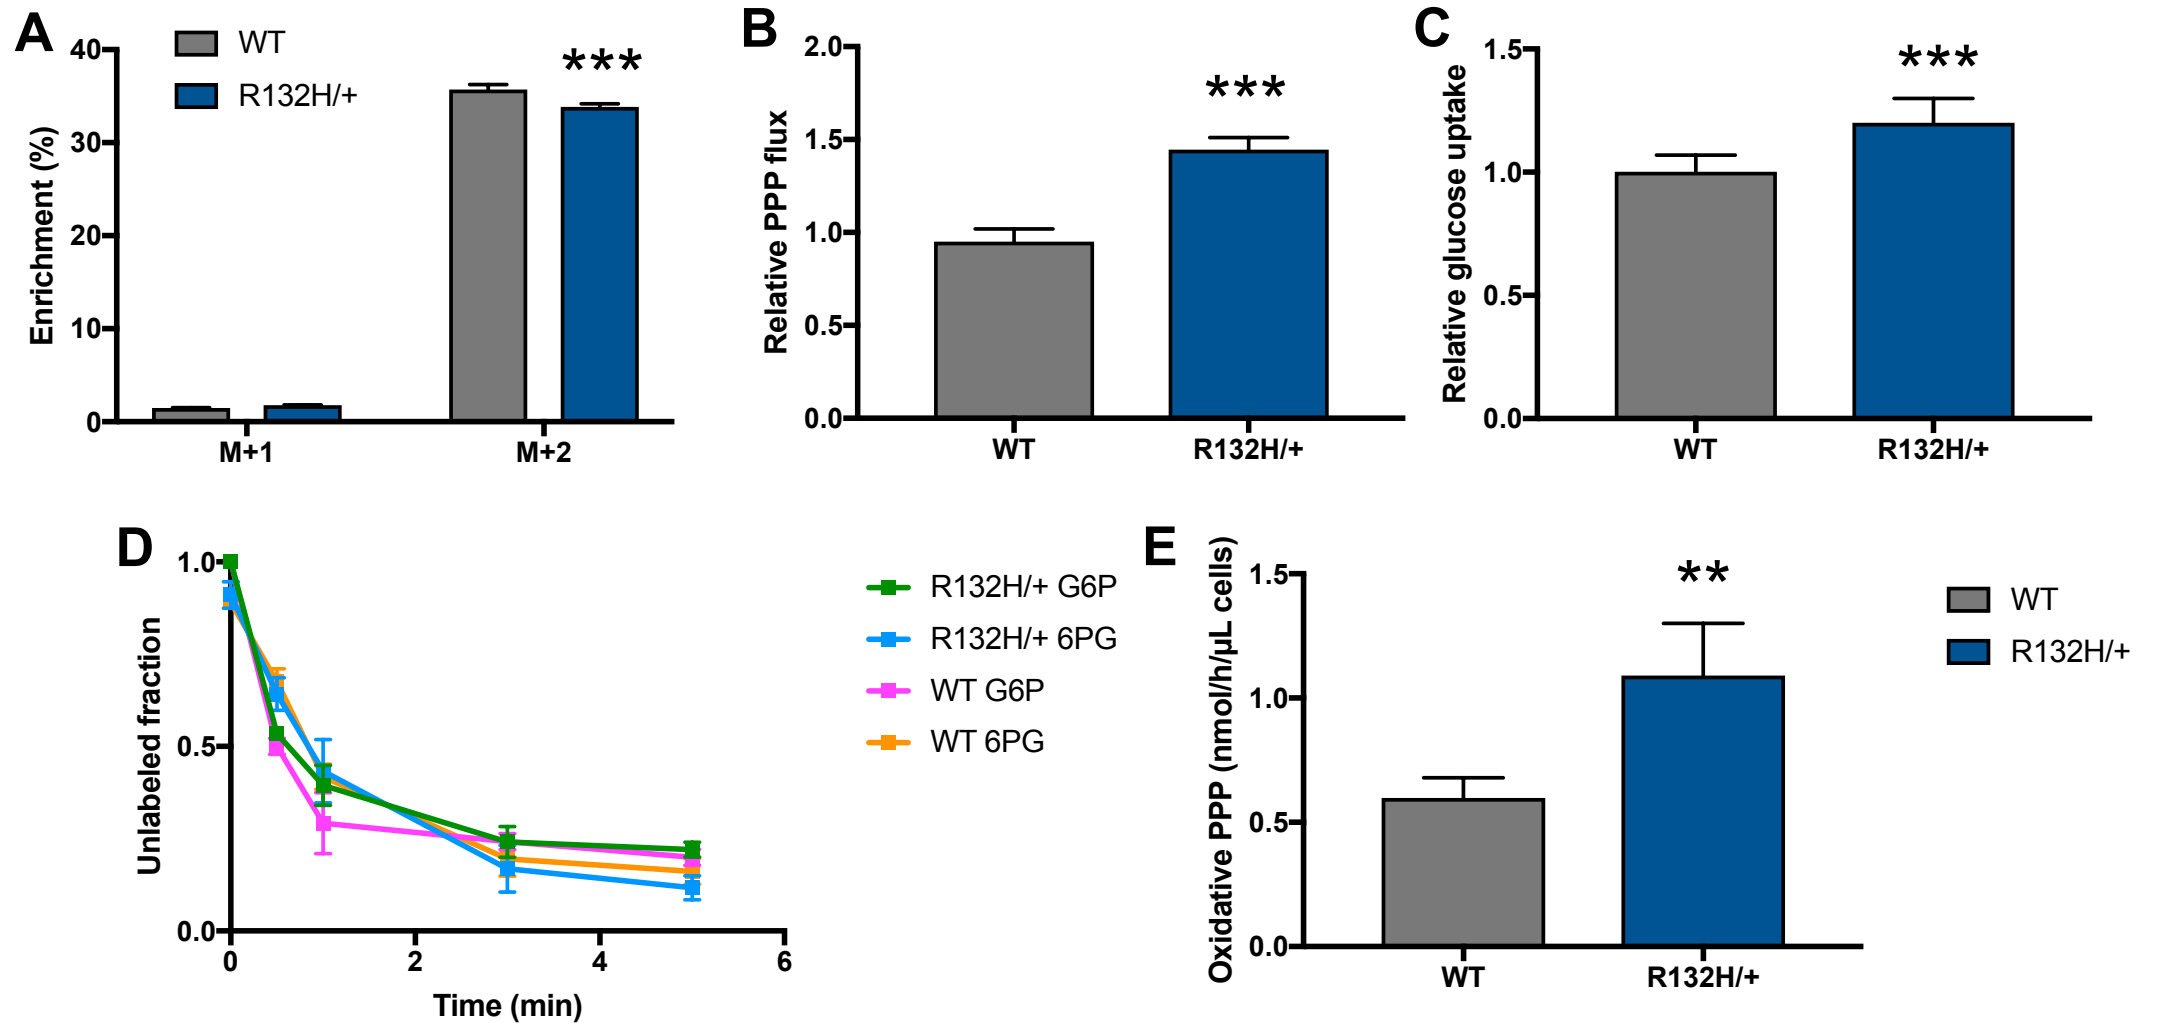

**Figure S1. *IDH1* mutants have increased PPP flux, Related to Figure 3.** (A-C) *IDH1* mutants have increased PPP flux when cultured in DMEM with 10% FBS and 5 mM glucose. (A) Isotopologue distribution of lactate in wild-type cells and HCT116 R132H/+ mutants. The M+1 isotopologue is a result of glucose carbon that passed through the PPP. The M+2 isotopologue corresponds to glucose carbon that was metabolized to lactate through glycolysis directly. (B) Relative PPP flux, as determined by lactate labeling from 1,2- $^{13}\text{C}_2$  glucose and glucose uptake. (C) Uptake of glucose by wildtype HCT116 cells and *IDH1* mutants. (D-E) The flux of the oxidative phase of the PPP is increased in HCT116 *IDH1* mutants relative to wild-type cells. (D) Decay of the unlabeled fraction of glucose 6-phosphate (G6P) and the unlabeled fraction of 6-phosphogluconate (6PG) in wild-type and R132H/+ cells. (E) Oxidative PPP flux was determined by fitting G6P and 6PG data with Newtonian type minimization, using the measured 6PG concentrations of 2.9 pmol per  $\mu\text{L}$  of cells and 3.5 pmol per  $\mu\text{L}$  of cells for wild-type and R132H/+ cells, respectively. Data shown are mean values  $\pm$  s.d. ( $n=3$ ). \*\* indicates a  $p$ -value  $< 0.01$ , and \*\*\* indicates a  $p$ -value  $< 0.001$ .

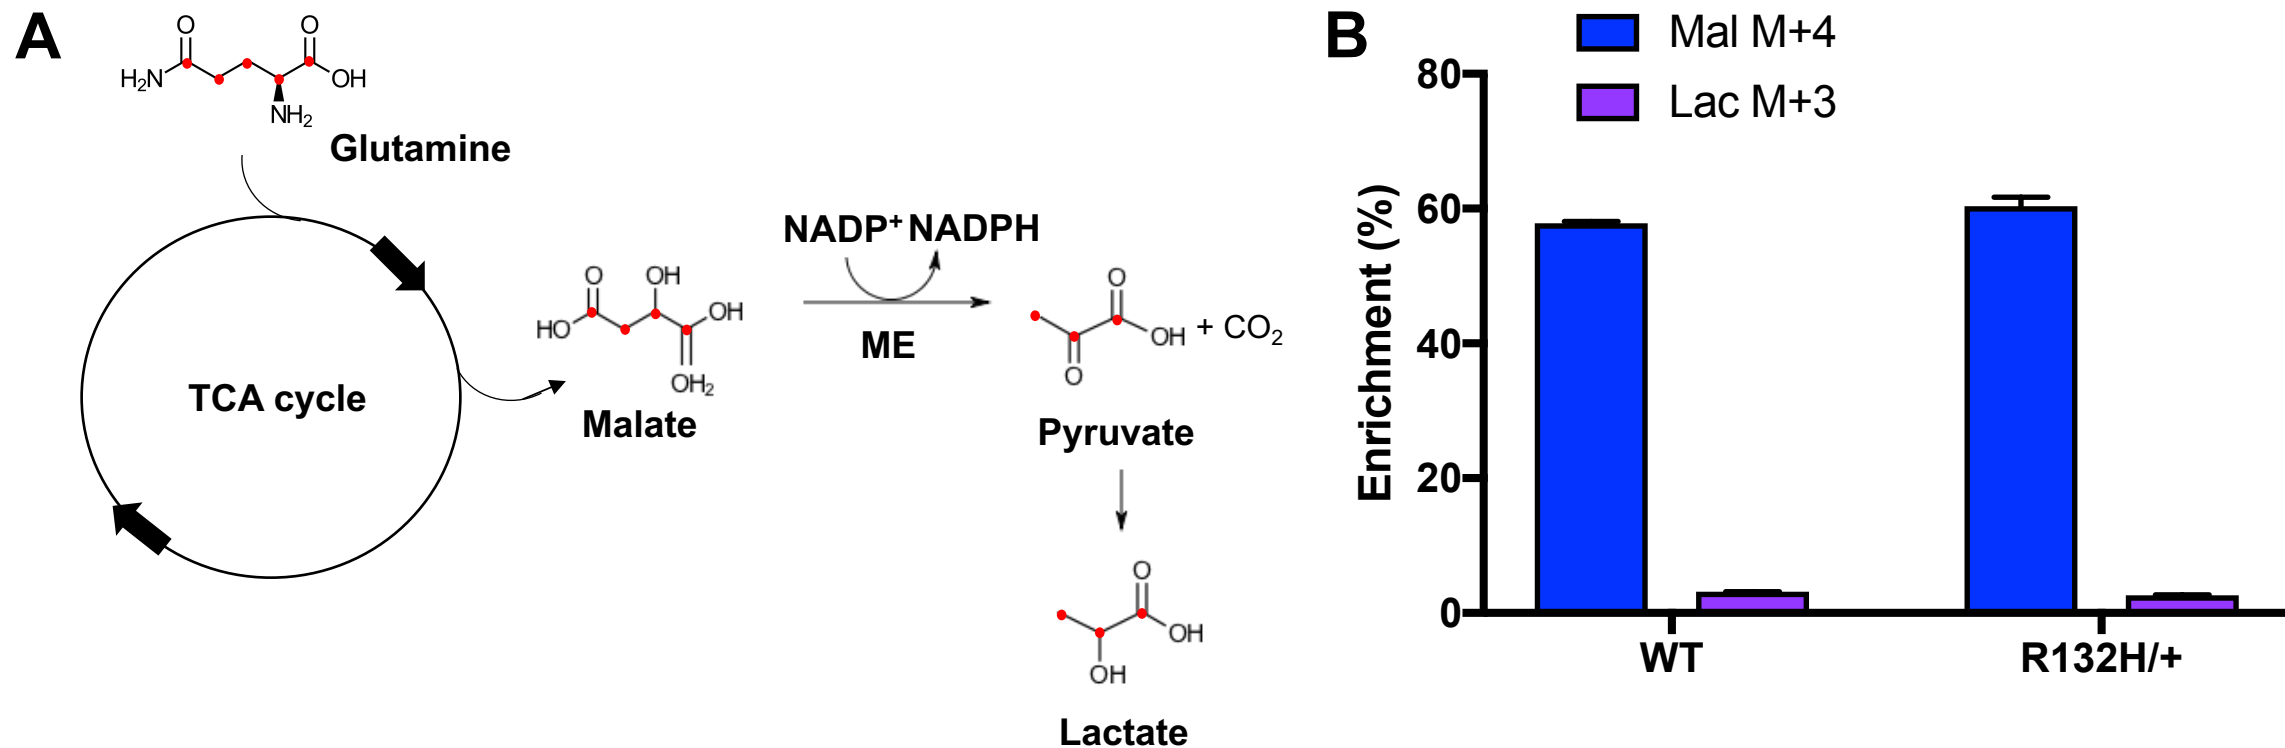

**Figure S2. Evaluating the activity of malic enzyme (ME) with U-<sup>13</sup>C glutamine, Related to Experimental Procedures.** (A) Schematic to show labeling when U-<sup>13</sup>C glutamine is transformed to lactate through ME. The ratios of labeled malate and lactate were analyzed. (B) Labeling of malate and lactate from U-<sup>13</sup>C glutamine. The data do not support increased ME activity in *IDH1* mutants relative to wild-type cells. It is important to note that this method does not differentiate between ME subtypes or compartmentalization of the NADPH produced. Data shown are mean values  $\pm$  s.d. ( $n=3$ ).

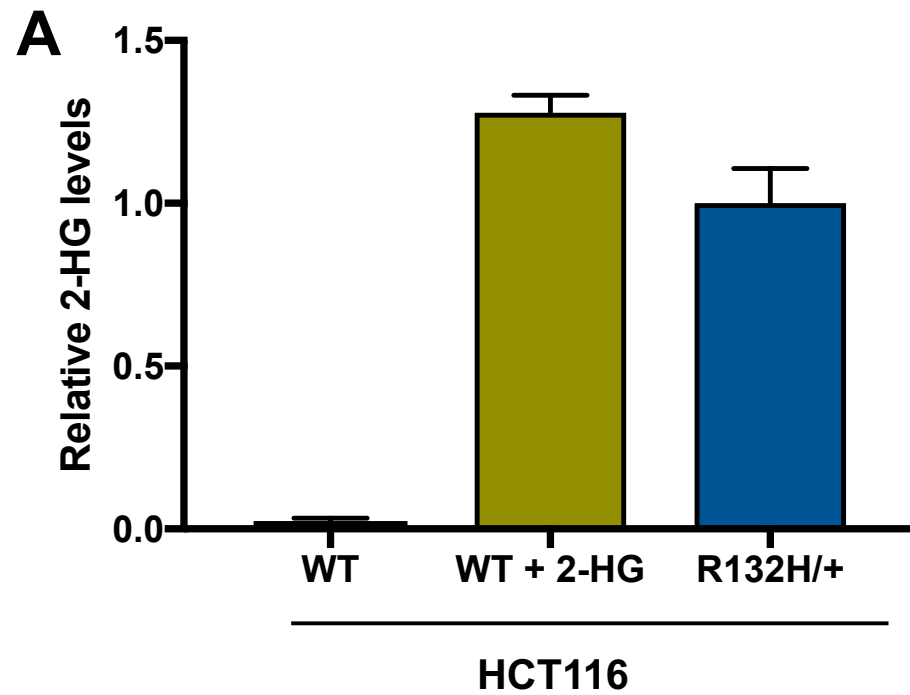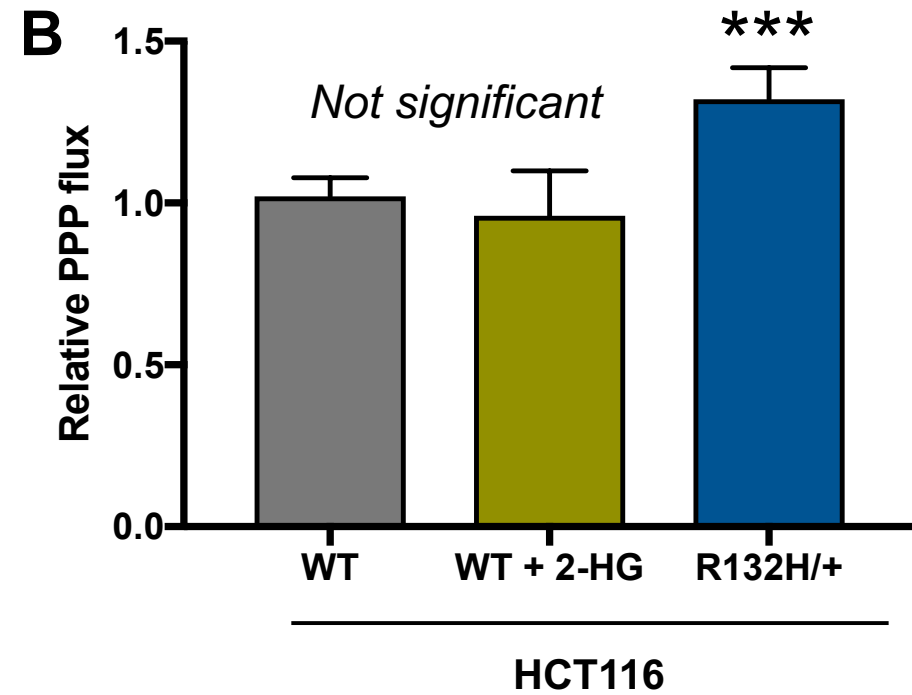

**Figure S3. Exposing cells to 2-HG does not increase PPP flux, Related to Figure 3.** (A) LC/MS measurements show that the intracellular concentration of 2-HG is comparable between HCT116 R132H/+ cells and wild-type cells treated with 0.1 mM octyl 2-HG. Wild-type cells alone display very low levels of 2-HG. (B) PPP flux of HCT116 wild-type cells exposed to 0.1 mM octyl 2-HG for 72 hrs. Compared to control wild-type cells, no significant change in PPP flux is detected upon treatment with octyl 2-HG. R132H/+ cells, however, have increased PPP flux relative to both wild-type and wild-type + octyl 2-HG. Data shown are mean values  $\pm$  s.d. ( $n=3$ ). \*\*\* indicates a  $p$ -value  $< 0.001$ .

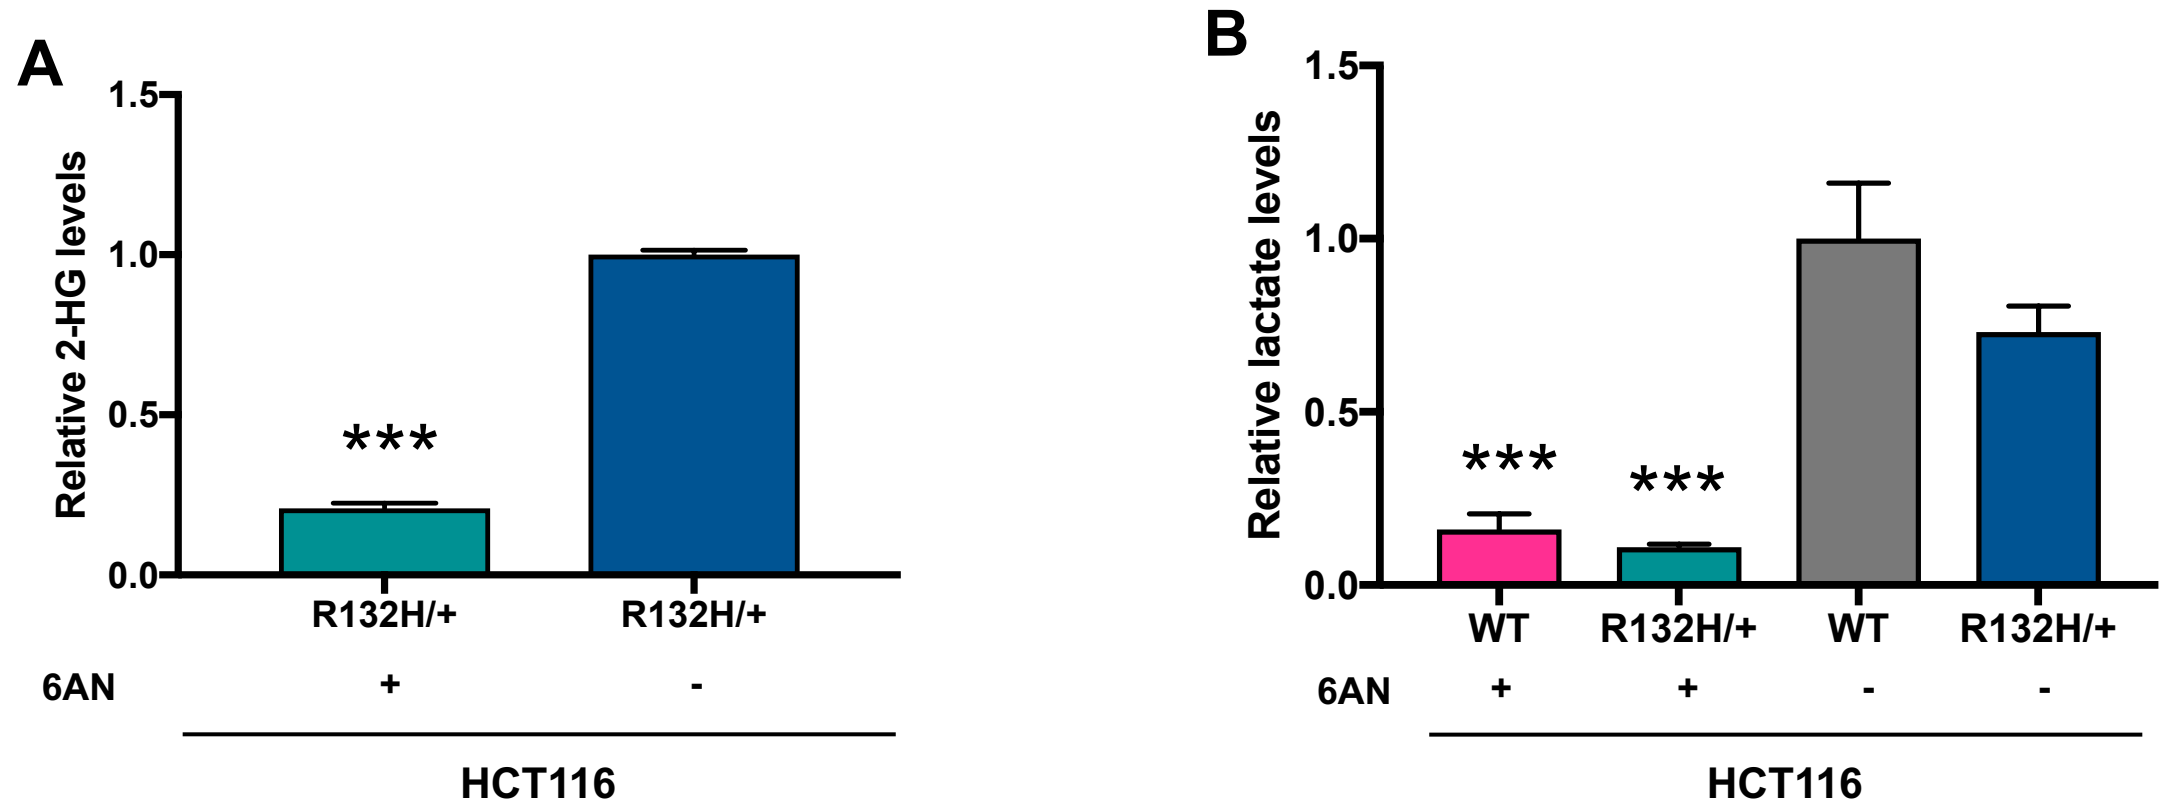

**Figure S4. Effects of 6-aminonicotinamide, an inhibitor of 6-phosphogluconate dehydrogenase, Related to Figure 3.** (A) Intracellular levels of 2-HG decrease after treating HCT116 R132H/+ cells with 6-aminonicotinamide for 24 hr. (B) The intracellular levels of other central carbon metabolites, such as lactate shown here, also decrease upon treatment with 6-aminonicotinamide for 24 hr. Data shown are mean values  $\pm$  s.d. ( $n=3$ ). \*\*\* indicates a  $p$ -value  $< 0.001$ .

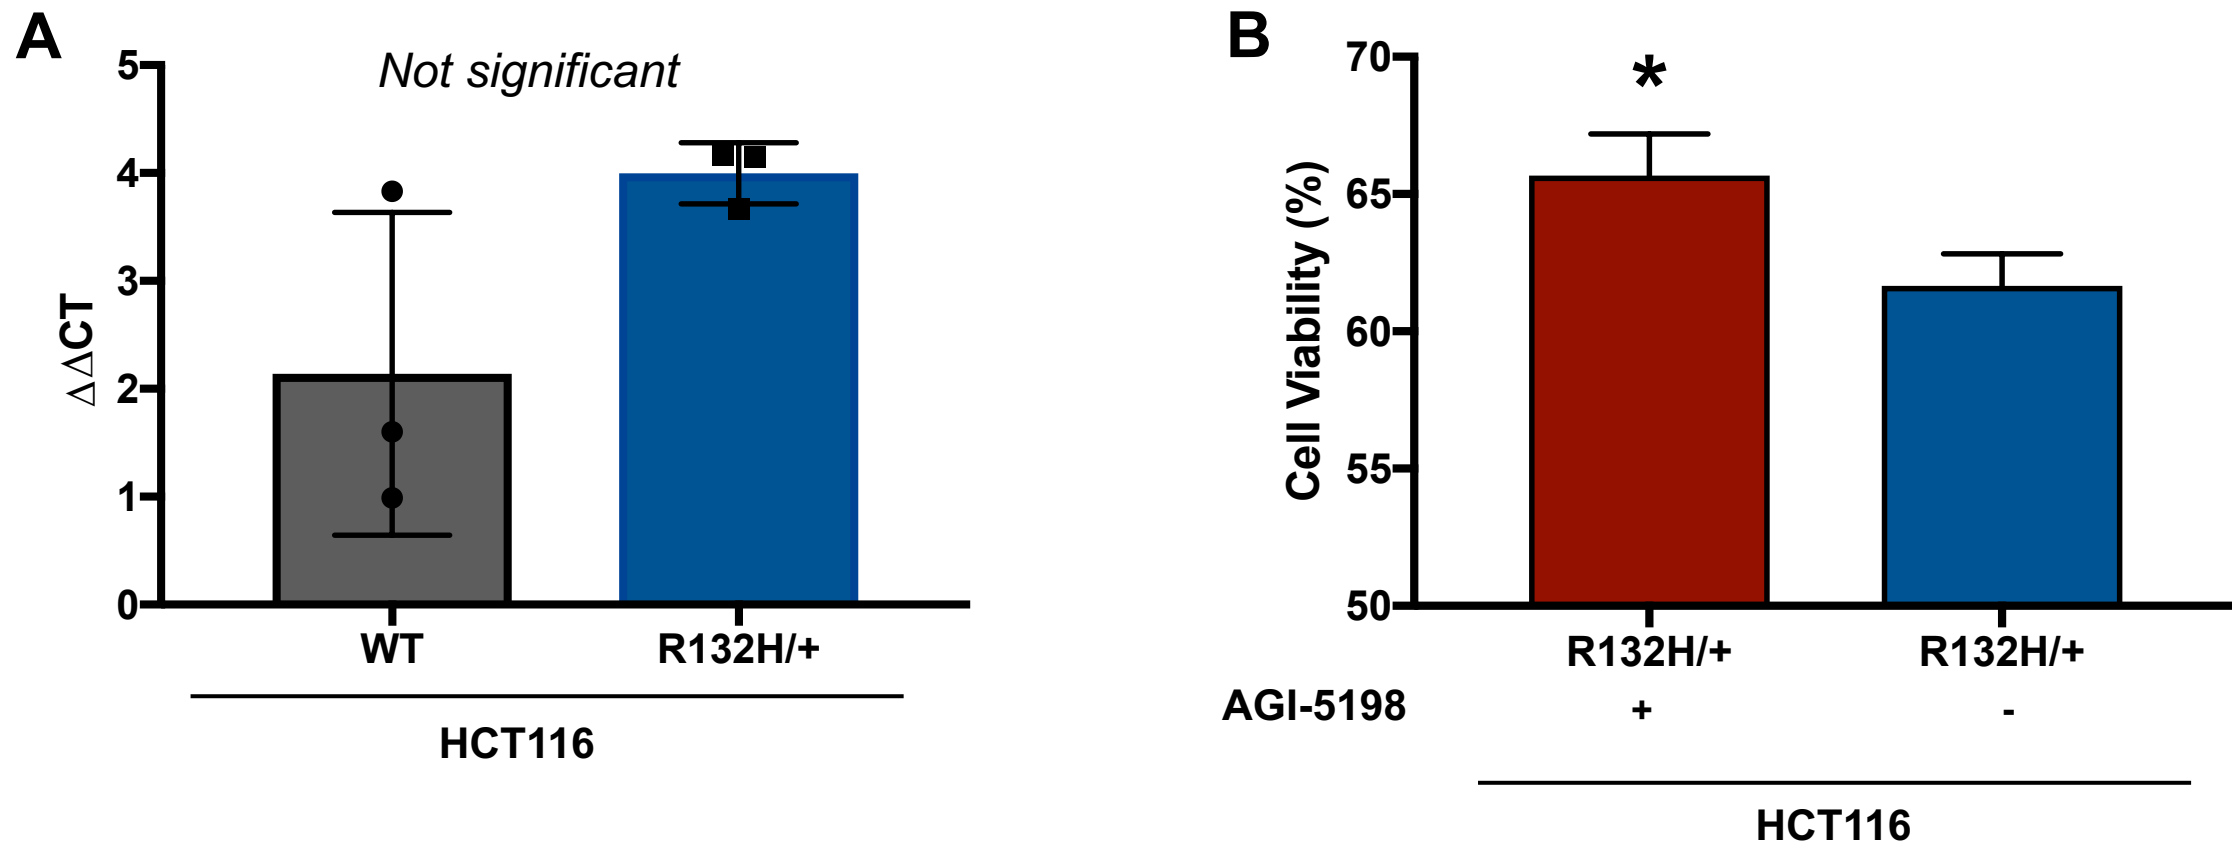

**Figure S5. Assessing the effects of increased NADPH consumption, Related to Experimental Procedures.** (A) Expression of G6PD is not statistically different between wildtype cells and *IDH1* mutants.  $\Delta\Delta CT$  values were determined by qPCR using beta actin as a housekeeping gene. (B) AGI-5198 protects *IDH1* mutants during  $H_2O_2$  exposure. Cells were exposed to 1 mM  $H_2O_2$  and cell viability was measured with a trypan blue exclusion assay. Data shown are mean values  $\pm$  s.d. ( $n=3$ ). \* indicates a  $p$ -value < 0.05.

## Supplemental Tables

**Supplemental Table S1. Fluxes of PPP and 2-HG production, Related to Figure 3.**

|                                               | WT              | R132H/+         |
|-----------------------------------------------|-----------------|-----------------|
| PPP flux (fmol per glucose per cell per hour) | $4.85 \pm 0.17$ | $6.92 \pm 0.23$ |
| 2-HG production flux (fmol/cell/hr)           | -               | $6.50 \pm 0.43$ |

**Supplemental Table S2. ISA values from cells labeled with U-<sup>13</sup>C glucose in the presence of exogenous acetate show that R132H/+ mutants use more acetate for palmitate synthesis compared to wildtype cells, Related to Figure 5.**

|                      | WT<br>acetate   | R132H/+<br>acetate |
|----------------------|-----------------|--------------------|
| $D_{\text{glucose}}$ | $0.62 \pm 0.02$ | $0.57 \pm 0.02$    |
| $g$ (24 hr)          | $0.68 \pm 0.03$ | $0.61 \pm 0.04$    |

## Supplemental Experimental Procedures

### *Kinetic Flux Profiling*

Kinetic flux profiling of the oxidative phase of the PPP was performed with U-<sup>13</sup>C glucose. Both wildtype and R132H cells were exposed to labeled glucose for 0.5, 1, 3, and 5 min. Media was then aspirated and cells were immediately quenched with 80:20 methanol:water at 4 °C. Cells were extracted as previously described (Yuan et al., 2008). The decay function of the unlabeled glycolytic and pentose phosphate intermediates were fitted with Newtonian minimizations and 95% confidence intervals were determined from t-values (OriginLab).

### *Quantitative RT-PCR*

Total RNA was isolated with TRIzol Reagent (Invitrogen) and single-strand cDNA was synthesized with a First Strand Synthesis Kit (Origene). PCR was performed with PowerUp SYBR Green Master Mix (Thermo Fisher) and StepOnePlus PCR instrument at 60 °C.

### *Malic enzyme measurement*

Cells were given U-<sup>13</sup>C glutamine for 24 hr to assess malic enzyme activity. The M+3 isotopologue of lactate and the M+4 isotopologue of malate were used to evaluate malic enzyme activity (Fan et al., 2014).
